# Supplementary material for: Anemia prevalence, severity, types, and correlates among adult women and men in a multiethnic Iranian population: the Khuzestan Comprehensive Health Study (KCHS)
Source: PubMed Central journal article supplement (PMC8787906; doi:10.1186/s12889-022-12512-6), 2022-01-25
Supplement: 12889_2022_12512_MOESM2_ESM.pdf [file 12889_2022_12512_MOESM2_ESM.pdf]

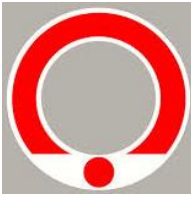

IBTO

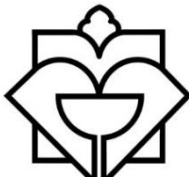

DUMS

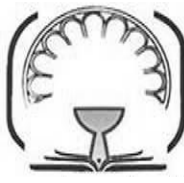

BehUMS

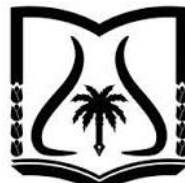

AbadanUMS

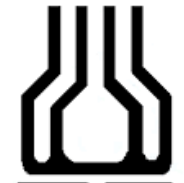

AJUMS

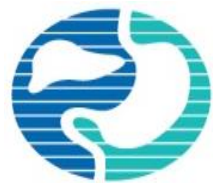

DDRI

## Questionnaire for assessing physical health status in Khuzestan province

|                     |                                                                                             |
|---------------------|---------------------------------------------------------------------------------------------|
| Date of interview:  | ..... / ..... / 20 ...                                                                      |
| Place of interview: | Province: .....<br>City: .....<br>Township: .....<br>Village: .....<br>Health center: ..... |
| Questioner:         | Name: .....<br>Family name: .....<br>Signature: .....                                       |

### ID- The unique KCHS ID for each participant

|                                                            |                                                            |                                                |                                                                                                    |                                                                    |
|------------------------------------------------------------|------------------------------------------------------------|------------------------------------------------|----------------------------------------------------------------------------------------------------|--------------------------------------------------------------------|
| Province code<br><input type="text"/> <input type="text"/> | Township code<br><input type="text"/> <input type="text"/> | Area of residence code<br><input type="text"/> | Family code<br><input type="text"/> <input type="text"/> <input type="text"/> <input type="text"/> | Person code in family<br><input type="text"/> <input type="text"/> |
|------------------------------------------------------------|------------------------------------------------------------|------------------------------------------------|----------------------------------------------------------------------------------------------------|--------------------------------------------------------------------|

### GI- General information

|                                                   |                                                                                                                                                                                     |
|---------------------------------------------------|-------------------------------------------------------------------------------------------------------------------------------------------------------------------------------------|
| G1. Name: .....                                   | G8. Occupation: .....                                                                                                                                                               |
| G2. Father's name: .....                          | G9. Telephone and cellphone number: .....                                                                                                                                           |
| G3. National code: .....                          | G10. Address: .....                                                                                                                                                                 |
| G4. Postal code: .....                            | G11. Gender: Female <input type="checkbox"/> ..... Male <input type="checkbox"/> .....                                                                                              |
| G5. E-mail: .....                                 | G12. Birth date: ..... / ..... / .....                                                                                                                                              |
| G6. Education years: (regardless of fails): ..... | G13. Marital status: Single <input type="checkbox"/> ..... Married <input type="checkbox"/> .....<br>Divorced <input type="checkbox"/> ..... Widowed <input type="checkbox"/> ..... |
| G7. Last educational establishment: .....         | G14. Insurance type: Uninsured <input type="checkbox"/> .... Insured <input type="checkbox"/> ....                                                                                  |

**GFI-** General family information (Not used in this study)

**PH/E-** Physical examinations and anthropometric measurements

| P1.           | P2.           | P3.              | P4.            | P5.              | P6.   | P7.   |
|---------------|---------------|------------------|----------------|------------------|-------|-------|
| Height (Cm)   | Weight (Kg)   | Waist circ. (Cm) | Hip circ. (Cm) | Wrist circ. (Cm) | SBP   | DBP   |
| ..... / ..... | ..... / ..... | ..... / .....    | ..... / .....  | ..... / .....    | ..... | ..... |

**S-** Sleep

|    |                                                                                             |                                                                                                   |
|----|---------------------------------------------------------------------------------------------|---------------------------------------------------------------------------------------------------|
| S1 | What time do you usually go to sleep?                                                       | ..... : .....                                                                                     |
| S2 | What is the average number of minutes it takes you to fall asleep at night?                 | ..... min                                                                                         |
| S3 | What time do you usually get up?                                                            | ..... : .....                                                                                     |
| S4 | What time do you prefer to get up?                                                          | ..... : .....                                                                                     |
| S5 | Do you nap during the day? (3 times a week or more)                                         | Yes <input type="checkbox"/> No <input type="checkbox"/><br>If yes: ..... min                     |
| S6 | Do you do night shift work? (now or in the past year, for at least 6 hours from 9pm - 6am.) | Yes <input type="checkbox"/> No <input type="checkbox"/><br>If yes: ..... times                   |
| S7 | While sleeping, do you have restless leg movements so that your partner notices?            | Yes <input type="checkbox"/> No <input type="checkbox"/><br>I don't know <input type="checkbox"/> |
| S8 | When doing nothing, are likely are you to doze off or fall asleep?                          | Yes <input type="checkbox"/> No <input type="checkbox"/>                                          |
| S9 | Do you often use hypnotics when you sleep? (2 times a week or more)                         | Yes <input type="checkbox"/> No <input type="checkbox"/>                                          |

**IPAQ-** International physical activity questionnaire

|                                                                                                                                                                                                                                                                                                                                                                                      |                                                                                                                                                                                                                                                                                                                                                                                              |
|--------------------------------------------------------------------------------------------------------------------------------------------------------------------------------------------------------------------------------------------------------------------------------------------------------------------------------------------------------------------------------------|----------------------------------------------------------------------------------------------------------------------------------------------------------------------------------------------------------------------------------------------------------------------------------------------------------------------------------------------------------------------------------------------|
| <p><b>Part 1. Job-related physical activity:</b> The first section is about your work. This includes paid jobs, farming, volunteer work, course work, and any other unpaid work that you did outside your home. Do not include unpaid work you might do around your home, like housework, yard work, general maintenance, and caring for your family. These are asked in Part 3.</p> |                                                                                                                                                                                                                                                                                                                                                                                              |
| PA1                                                                                                                                                                                                                                                                                                                                                                                  | Do you currently have a job or do any unpaid work outside your home?<br>Yes <input type="checkbox"/><br>No <input type="checkbox"/> → Skip to part 2                                                                                                                                                                                                                                         |
| PA2                                                                                                                                                                                                                                                                                                                                                                                  | During the last 7 days, on how many days did you do vigorous physical activities like heavy lifting, digging, heavy construction, or climbing up stairs as part of your work? Think about only those physical activities that you did for at least 10 minutes at a time.<br>..... days per week.<br>No vigorous job-related physical activity. <input type="checkbox"/> → Skip to question 4 |

|                                                                                                                                                                            |                                                                                                                                                                                                                                                                                                                                                                                      |  |
|----------------------------------------------------------------------------------------------------------------------------------------------------------------------------|--------------------------------------------------------------------------------------------------------------------------------------------------------------------------------------------------------------------------------------------------------------------------------------------------------------------------------------------------------------------------------------|--|
| PA3                                                                                                                                                                        | How much time did you usually spend on one of those days doing vigorous physical activities as part of your work?<br>..... hours per day<br>..... minutes per day                                                                                                                                                                                                                    |  |
| PA4                                                                                                                                                                        | Again, think about only those physical activities that you did for at least 10 minutes at a time. During the last 7 days, on how many days did you do moderate physical activities like carrying light loads as part of your work? Please do not include walking.<br>..... days per week<br>No moderate job-related physical activity. <input type="checkbox"/> → Skip to question 6 |  |
| PA5                                                                                                                                                                        | How much time did you usually spend on one of those days doing moderate physical activities as part of your work?<br>..... hours per day<br>..... minutes per day                                                                                                                                                                                                                    |  |
| PA6                                                                                                                                                                        | During the last 7 days, on how many days did you walk for at least 10 minutes at a time as part of your work? Please do not count any walking you did to travel to or from work.<br>..... days per week<br>No job-related walking. <input type="checkbox"/> → Skip to part 2                                                                                                         |  |
| PA7                                                                                                                                                                        | How much time did you usually spend on one of those days walking as part of your work?<br>..... hours per day<br>..... minutes per day                                                                                                                                                                                                                                               |  |
| <b>Part 2. Transportation physical activity:</b> These questions are about how you traveled from place to place, including to places like work, stores, movies, and so on. |                                                                                                                                                                                                                                                                                                                                                                                      |  |
| PA8                                                                                                                                                                        | During the last 7 days, on how many days did you travel in a motor vehicle like a train, bus, car, or tram?<br>..... days per week<br>No traveling in a motor vehicle. <input type="checkbox"/> → Skip to question 10                                                                                                                                                                |  |
| PA9                                                                                                                                                                        | How much time did you usually spend on one of those days traveling in a train, bus, car, tram, or other kind of motor vehicle?<br>..... hours per day<br>..... minutes per day                                                                                                                                                                                                       |  |
| Now think only about the bicycling and walking you might have done to travel to and from work, to do errands, or to go from place to place.                                |                                                                                                                                                                                                                                                                                                                                                                                      |  |
| PA10                                                                                                                                                                       | During the last 7 days, on how many days did you bicycle for at least 10 minutes at a time to go from place to place?<br>..... days per week<br>No bicycling from place to place. <input type="checkbox"/> → Skip to question 12                                                                                                                                                     |  |
| PA11                                                                                                                                                                       | How much time did you usually spend on one of those days to bicycle from place to place?<br>..... hours per day<br>..... minutes per day                                                                                                                                                                                                                                             |  |
| PA12                                                                                                                                                                       | During the last 7 days, on how many days did you walk for at least 10 minutes at a time to go from place to place?<br>..... days per week<br>No walking from place to place. <input type="checkbox"/> → Skip to part 3                                                                                                                                                               |  |

|                                                                                                                                                                                                                                                                                              |                                                                                                                                                                                                                                                                                                                                                                                    |  |
|----------------------------------------------------------------------------------------------------------------------------------------------------------------------------------------------------------------------------------------------------------------------------------------------|------------------------------------------------------------------------------------------------------------------------------------------------------------------------------------------------------------------------------------------------------------------------------------------------------------------------------------------------------------------------------------|--|
| PA13                                                                                                                                                                                                                                                                                         | How much time did you usually spend on one of those days walking from place to place?<br>..... hours per day<br>..... minutes per day                                                                                                                                                                                                                                              |  |
| <p><b>Part 3. Housework, house maintenance, and caring for family:</b> This section is about some of the physical activities you might have done in the last 7 days in and around your home, like housework, gardening, yard work, general maintenance work, and caring for your family.</p> |                                                                                                                                                                                                                                                                                                                                                                                    |  |
| PA14                                                                                                                                                                                                                                                                                         | Think about only those physical activities that you did for at least 10 minutes at a time. During the last 7 days, on how many days did you do vigorous physical activities like heavy lifting, chopping wood, shoveling snow, or digging in the garden or yard?<br>..... days per week<br>No vigorous activity in garden or yard. <input type="checkbox"/> → Skip to question 16  |  |
| PA15                                                                                                                                                                                                                                                                                         | How much time did you usually spend on one of those days doing vigorous physical activities in the garden or yard?<br>..... hours per day<br>..... minutes per day                                                                                                                                                                                                                 |  |
| PA16                                                                                                                                                                                                                                                                                         | Again, think about only those physical activities that you did for at least 10 minutes at a time. During the last 7 days, on how many days did you do moderate activities like carrying light loads, sweeping, washing windows, and raking in the garden or yard?<br>..... days per week<br>No moderate activity in garden or yard. <input type="checkbox"/> → Skip to question 18 |  |
| PA17                                                                                                                                                                                                                                                                                         | How much time did you usually spend on one of those days doing moderate physical activities in the garden or yard?<br>..... hours per day<br>..... minutes per day                                                                                                                                                                                                                 |  |
| PA18                                                                                                                                                                                                                                                                                         | Once again, think about only those physical activities that you did for at least 10 minutes at a time. During the last 7 days, on how many days did you do moderate activities like carrying light loads, washing windows, scrubbing floors and sweeping inside your home?<br>..... days per week<br>No moderate activity inside home. <input type="checkbox"/> → Skip to part 4   |  |
| PA19                                                                                                                                                                                                                                                                                         | How much time did you usually spend on one of those days doing moderate physical activities inside your home?<br>..... hours per day<br>..... minutes per day                                                                                                                                                                                                                      |  |
| <p><b>Part 4. Recreation, sport, and leisure-time physical activity:</b> This section is about all the physical activities that you did in the last 7 days solely for recreation, sport, exercise or leisure. Please do not include any activities you have already mentioned.</p>           |                                                                                                                                                                                                                                                                                                                                                                                    |  |
| PA20                                                                                                                                                                                                                                                                                         | Not counting any walking, you have already mentioned, during the last 7 days, on how many days did you walk for at least 10 minutes at a time in your leisure time?<br>..... days per week<br>No walking in leisure time. <input type="checkbox"/> → Skip to question 22                                                                                                           |  |
| PA21                                                                                                                                                                                                                                                                                         | How much time did you usually spend on one of those days walking in your leisure time?<br>..... hours per day<br>..... minutes per day                                                                                                                                                                                                                                             |  |

|                                                                                                                                                                                                                                                                                                                                                                                             |                                                                                                                                                                                                                                                                                                                                                                                                     |  |
|---------------------------------------------------------------------------------------------------------------------------------------------------------------------------------------------------------------------------------------------------------------------------------------------------------------------------------------------------------------------------------------------|-----------------------------------------------------------------------------------------------------------------------------------------------------------------------------------------------------------------------------------------------------------------------------------------------------------------------------------------------------------------------------------------------------|--|
| PA22                                                                                                                                                                                                                                                                                                                                                                                        | Think about only those physical activities that you did for at least 10 minutes at a time. During the last 7 days, on how many days did you do vigorous physical activities like aerobics, running, fast bicycling, or fast swimming in your leisure time?<br>..... days per week<br>No vigorous activity in leisure time. <input type="checkbox"/> → Skip to question 24                           |  |
| PA23                                                                                                                                                                                                                                                                                                                                                                                        | How much time did you usually spend on one of those days doing vigorous physical activities in your leisure time?<br>..... hours per day<br>..... minutes per day                                                                                                                                                                                                                                   |  |
| PA24                                                                                                                                                                                                                                                                                                                                                                                        | Again, think about only those physical activities that you did for at least 10 minutes at a time. During the last 7 days, on how many days did you do moderate physical activities like bicycling at a regular pace, swimming at a regular pace, and doubles tennis in your leisure time?<br>..... days per week<br>No moderate activity in leisure time. <input type="checkbox"/> → Skip to part 5 |  |
| PA25                                                                                                                                                                                                                                                                                                                                                                                        | How much time did you usually spend on one of those days doing moderate physical activities in your leisure time?<br>..... hours per day<br>..... minutes per day                                                                                                                                                                                                                                   |  |
| <b>Part 5. Time spent sitting:</b><br>The last questions are about the time you spend sitting while at work, at home, while doing course work and during leisure time. This may include time spent sitting at a desk, visiting friends, reading or sitting or lying down to watch television. Do not include any time spent sitting in a motor vehicle that you have already told me about. |                                                                                                                                                                                                                                                                                                                                                                                                     |  |
| PA26                                                                                                                                                                                                                                                                                                                                                                                        | During the last 7 days, how much time did you usually spend sitting on a weekday?<br>..... hours per day<br>..... minutes per day                                                                                                                                                                                                                                                                   |  |
| PA27                                                                                                                                                                                                                                                                                                                                                                                        | During the last 7 days, how much time did you usually spend sitting on a weekend day?<br>..... hours per day<br>..... minutes per day                                                                                                                                                                                                                                                               |  |

**RH-** Female and male reproductive history (Not used in this study)

**PMH-** Past medical history of chronic diseases (Only the ones that were used in this study)

|      |                        |                                                          |                              |                                            |
|------|------------------------|----------------------------------------------------------|------------------------------|--------------------------------------------|
| PMH1 | Diabetes               | Yes <input type="checkbox"/> No <input type="checkbox"/> | Onset age: .....             | Less than a year. <input type="checkbox"/> |
| PMH2 | HTN                    | Yes <input type="checkbox"/> No <input type="checkbox"/> | Onset age: .....             | Less than a year. <input type="checkbox"/> |
| PMH3 | HLP                    | Yes <input type="checkbox"/> No <input type="checkbox"/> | Onset age: .....             | Less than a year. <input type="checkbox"/> |
| PMH4 | Malignancy             | Yes <input type="checkbox"/> No <input type="checkbox"/> | Type: ..... Onset age: ..... | Less than a year. <input type="checkbox"/> |
| PMH5 | Chronic kidney disease | Yes <input type="checkbox"/> No <input type="checkbox"/> | Onset age: .....             | Less than a year. <input type="checkbox"/> |
|      | Dialysis               | Yes <input type="checkbox"/> No <input type="checkbox"/> | Onset age: .....             | Less than a year. <input type="checkbox"/> |
|      | Kidney transplantation | Yes <input type="checkbox"/> No <input type="checkbox"/> | Onset age: .....             | Less than a year. <input type="checkbox"/> |

**HH-** Habitual history (Only the ones that were used in this study)

|     |                                                  |                                                          |                     |
|-----|--------------------------------------------------|----------------------------------------------------------|---------------------|
| HH1 | Do you currently smoke?                          | Yes <input type="checkbox"/> No <input type="checkbox"/> | For how long? ..... |
| HH2 | If not, have you ever smoked in the past?        | Yes <input type="checkbox"/> No <input type="checkbox"/> | For how long? ..... |
| HH3 | Do you currently smoke hookah?                   | Yes <input type="checkbox"/> No <input type="checkbox"/> | For how long? ..... |
| HH4 | If not, have you ever smoked hookah in the past? | Yes <input type="checkbox"/> No <input type="checkbox"/> | For how long? ..... |
| HH5 | Do you currently use opium?                      | Yes <input type="checkbox"/> No <input type="checkbox"/> | For how long? ..... |
| HH6 | If not, have you ever used opium in the past?    | Yes <input type="checkbox"/> No <input type="checkbox"/> | For how long? ..... |
| HH7 | Do you currently drink alcohol?                  | Yes <input type="checkbox"/> No <input type="checkbox"/> | For how long? ..... |
| HH8 | If not, have you ever drunk alcohol in the past? | Yes <input type="checkbox"/> No <input type="checkbox"/> | For how long? ..... |

**DH-** Drug history

| Drug name | For how long |
|-----------|--------------|
|           |              |
|           |              |
|           |              |

**FH-** Family history (Not used in this study)

**DT-** Factors associated with disease transmission (Not used in this study)

**SES-** Socioeconomic status

|      |                                                                                                                                                                                                                                                                                                                                    |  |
|------|------------------------------------------------------------------------------------------------------------------------------------------------------------------------------------------------------------------------------------------------------------------------------------------------------------------------------------|--|
| SES1 | What is the tenure status of the home used by the household?<br>1. Ownership <input type="checkbox"/> 2. Rent <input type="checkbox"/> 3. Organizational (governmental or private) <input type="checkbox"/> 4. Kinship (parents or relatives with no renting contract) <input type="checkbox"/> 5. Others <input type="checkbox"/> |  |
| SES2 | What is the area of the residential unit? (Regardless of garden, porch, workshop, yard, and where the animals are kept)?<br>..... m <sup>2</sup>                                                                                                                                                                                   |  |
| SES3 | Number of rooms in current home? (Regardless of living room and kitchen?)<br>..... rooms                                                                                                                                                                                                                                           |  |
| SES4 | How many family members live together in your current home?<br>..... members                                                                                                                                                                                                                                                       |  |

|      |                                                                                                                                                                                                                                                                                                                                                                                                                                                                                                                                                                                                                                                                                                                                                                                                                                                                                                                                                                                                                                                                            |  |
|------|----------------------------------------------------------------------------------------------------------------------------------------------------------------------------------------------------------------------------------------------------------------------------------------------------------------------------------------------------------------------------------------------------------------------------------------------------------------------------------------------------------------------------------------------------------------------------------------------------------------------------------------------------------------------------------------------------------------------------------------------------------------------------------------------------------------------------------------------------------------------------------------------------------------------------------------------------------------------------------------------------------------------------------------------------------------------------|--|
| SES5 | Which of the following items do your home own?                                                                                                                                                                                                                                                                                                                                                                                                                                                                                                                                                                                                                                                                                                                                                                                                                                                                                                                                                                                                                             |  |
|      | 1. Separate freezer: Yes <input type="checkbox"/> No <input type="checkbox"/><br>2. Computer/laptop: Yes <input type="checkbox"/> No <input type="checkbox"/><br>3. Washing machine: Yes <input type="checkbox"/> No <input type="checkbox"/><br>4. Internet access: Yes <input type="checkbox"/> No <input type="checkbox"/><br>5. Dishwashing machine: Yes <input type="checkbox"/> No <input type="checkbox"/><br>6. Motorcycle: Yes <input type="checkbox"/> No <input type="checkbox"/><br>7. Indoor bathroom/shower: Yes <input type="checkbox"/> No <input type="checkbox"/><br>8. Color TV: Yes <input type="checkbox"/> No <input type="checkbox"/> , If yes: Ordinary <input type="checkbox"/><br>Plasma <input type="checkbox"/><br>9. Vacuum cleaner: Yes <input type="checkbox"/> No <input type="checkbox"/><br>10. Car: Yes <input type="checkbox"/> No, If yes: <20 million Toman <input type="checkbox"/><br>20-50 million Toman <input type="checkbox"/><br>50-100 million Toman <input type="checkbox"/><br>>100 million Toman <input type="checkbox"/> |  |
| SES6 | Which of the following items do the home occupants own?                                                                                                                                                                                                                                                                                                                                                                                                                                                                                                                                                                                                                                                                                                                                                                                                                                                                                                                                                                                                                    |  |
|      | 1. Cellphone: Yes <input type="checkbox"/> No <input type="checkbox"/><br>2. Laptop: Yes <input type="checkbox"/> No <input type="checkbox"/><br>3. Computer: Yes <input type="checkbox"/> No <input type="checkbox"/><br>4. Internet Access: Yes <input type="checkbox"/> No <input type="checkbox"/><br>5. Car: Yes <input type="checkbox"/> No, If yes: <20 million Toman <input type="checkbox"/><br>20-50 million Toman <input type="checkbox"/><br>50-100 million Toman <input type="checkbox"/><br>>100 million Toman <input type="checkbox"/>                                                                                                                                                                                                                                                                                                                                                                                                                                                                                                                      |  |
| SES7 | The number of extracurricular and non-professional books that you have read in the previous year (excluding scriptures and prayers)?<br>..... books                                                                                                                                                                                                                                                                                                                                                                                                                                                                                                                                                                                                                                                                                                                                                                                                                                                                                                                        |  |
| SES8 | The number of trips to foreign countries in a lifetime?<br>..... pilgrimage<br>..... non-pilgrimage<br>Never <input type="checkbox"/>                                                                                                                                                                                                                                                                                                                                                                                                                                                                                                                                                                                                                                                                                                                                                                                                                                                                                                                                      |  |
| SES9 | The number of internal trips in the last ten years (pilgrimage or tourism that is at least 100 km away from the residence)?<br>..... trips<br>Never <input type="checkbox"/>                                                                                                                                                                                                                                                                                                                                                                                                                                                                                                                                                                                                                                                                                                                                                                                                                                                                                               |  |

**Psychology survey- LEC, PCL, War and DASS (Not used in this study)**
